# Supplementary material for: Development of thermo-responsive polycaprolactone macrocarriers conjugated with Poly(N-isopropyl acrylamide) for cell culture
Source: PubMed Central journal article supplement (PMC6401373; doi:10.1038/s41598-019-40242-0), 2019-03-05

**Supplementary Information for *Scientific Reports***

**Development of thermo-responsive polycaprolactone  
macrocarriers conjugated with Poly(N-isopropyl acrylamide) for  
cell culture**

Linh T. B. Nguyen<sup>1</sup>, Akinlolu O. O. Odeleye<sup>1,†</sup>, Chih-Yao Chui<sup>1</sup>, Timothée Baudequin<sup>1</sup>,  
Zhanfeng Cui<sup>1</sup>, Hua Ye<sup>1,\*</sup>

<sup>1</sup>*Institute of Biomedical Engineering, Department of Engineering Science, University of Oxford, OX3 7DQ, UK.*

<sup>†</sup>*Current Address: Adaptimmune Limited, 60 Jubilee Avenue, Milton Park, Abingdon, OX14 4RX, UK*

## Supplementary Figure S1

**Figure S1.** (a) Hoechst staining images of HDF on PCL-PNIPAAm after 7 days of incubation and (b) GFP was cloned into MSCs and green emission was observed in a fluorescent microscopy at day 3 and 7 (in low magnification).

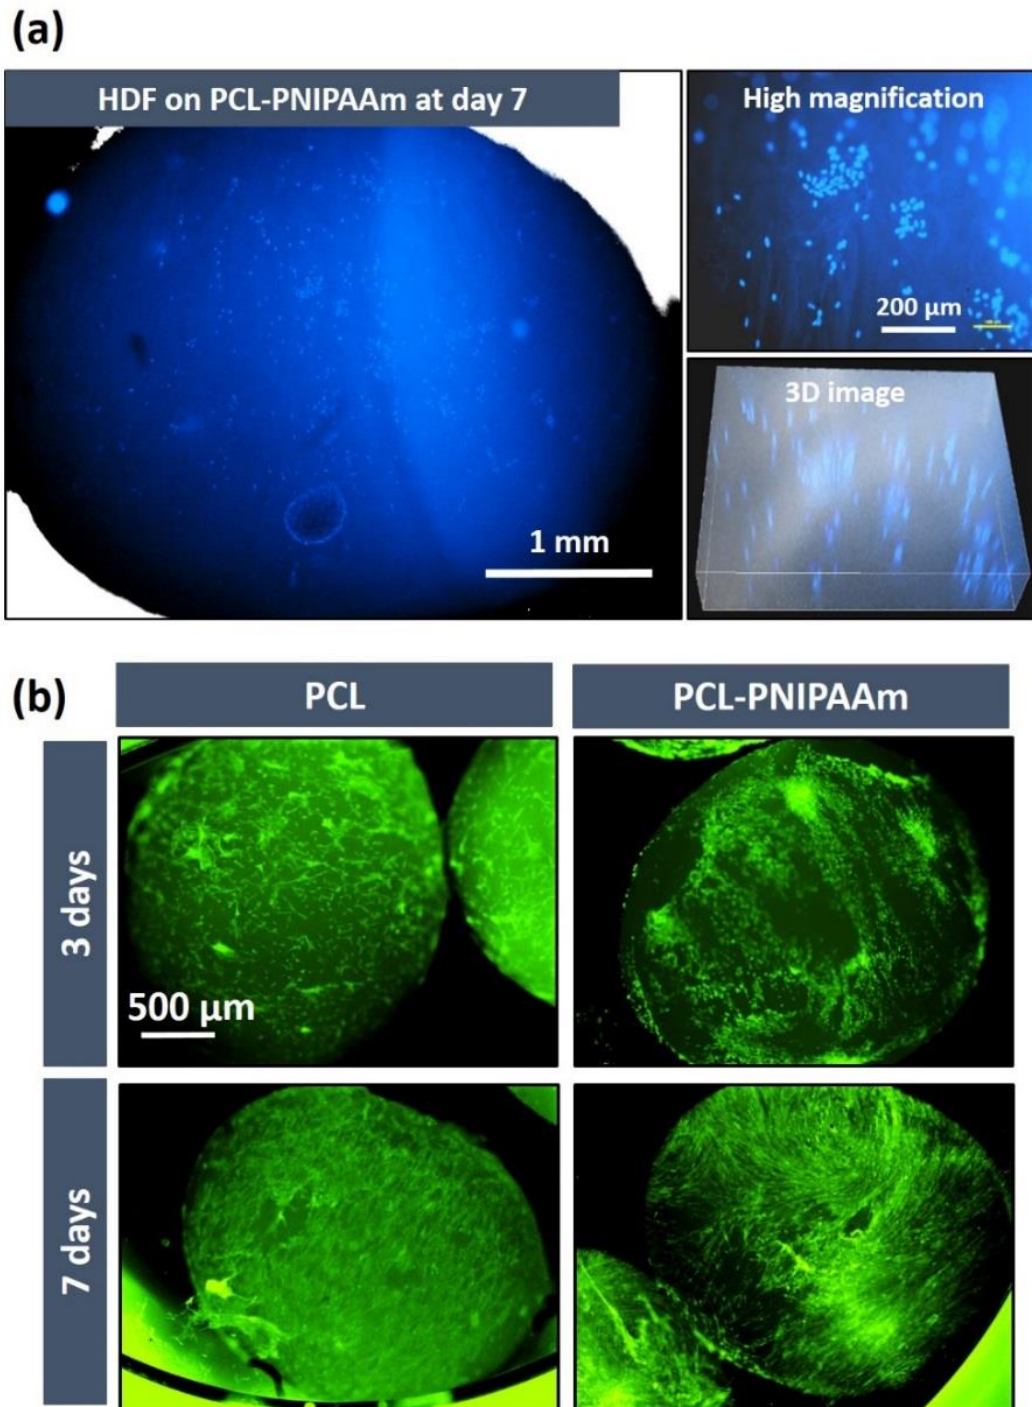

## Supplementary Figure S2

**Figure S2.** (a) and (b) Phase contrast images of HDF detachment from PCL and PCL-PNIPAAm by either trypsin treatment or temperature drop from 37 °C to 30 °C and (c) Green field fluorescence images of MSC detachment from PCL and PCL-PNIPAAm by either trypsin treatment or temperature drop from 37 °C to 30 °C.

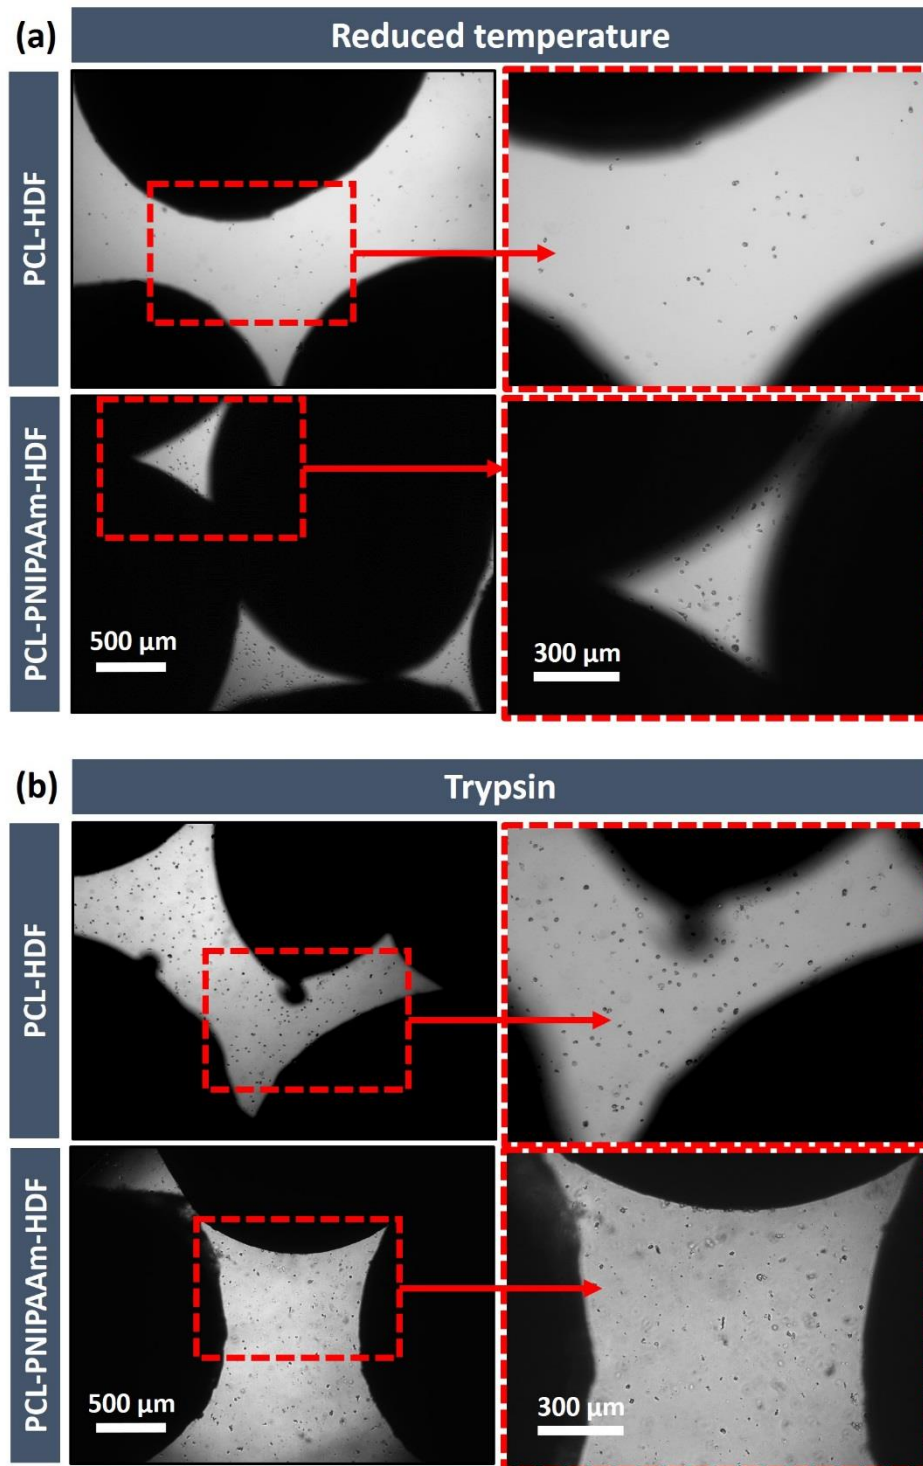

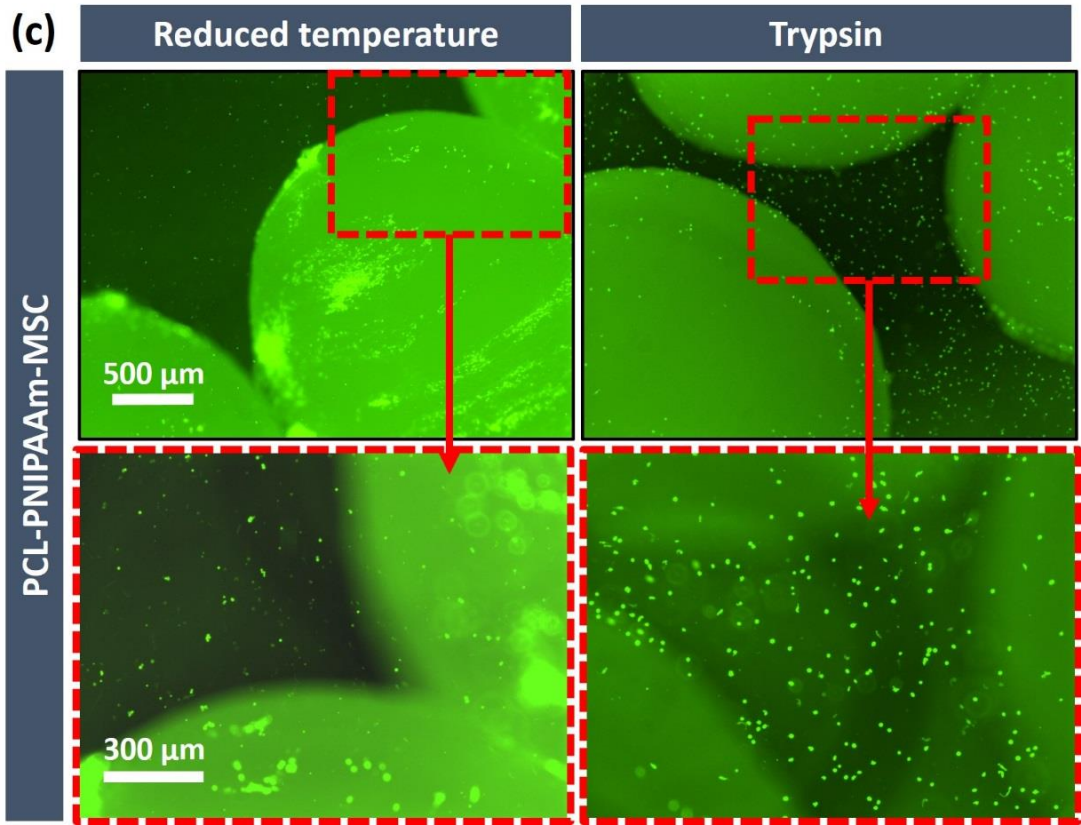

**Supplementary Figure S3**

**Figure S3.** Full-length Western Blots: (a) Antibodies against laminin (lane 1-4), (b) Fibronectin (lane 1-4), (c) Collagen 1 (lane 1-4) and beta-actin (lane 1-4). Marker: lane 0 (Precision Plus Protein™ Kaleidoscope™ Prestained Protein Standards, Bio-Rad).

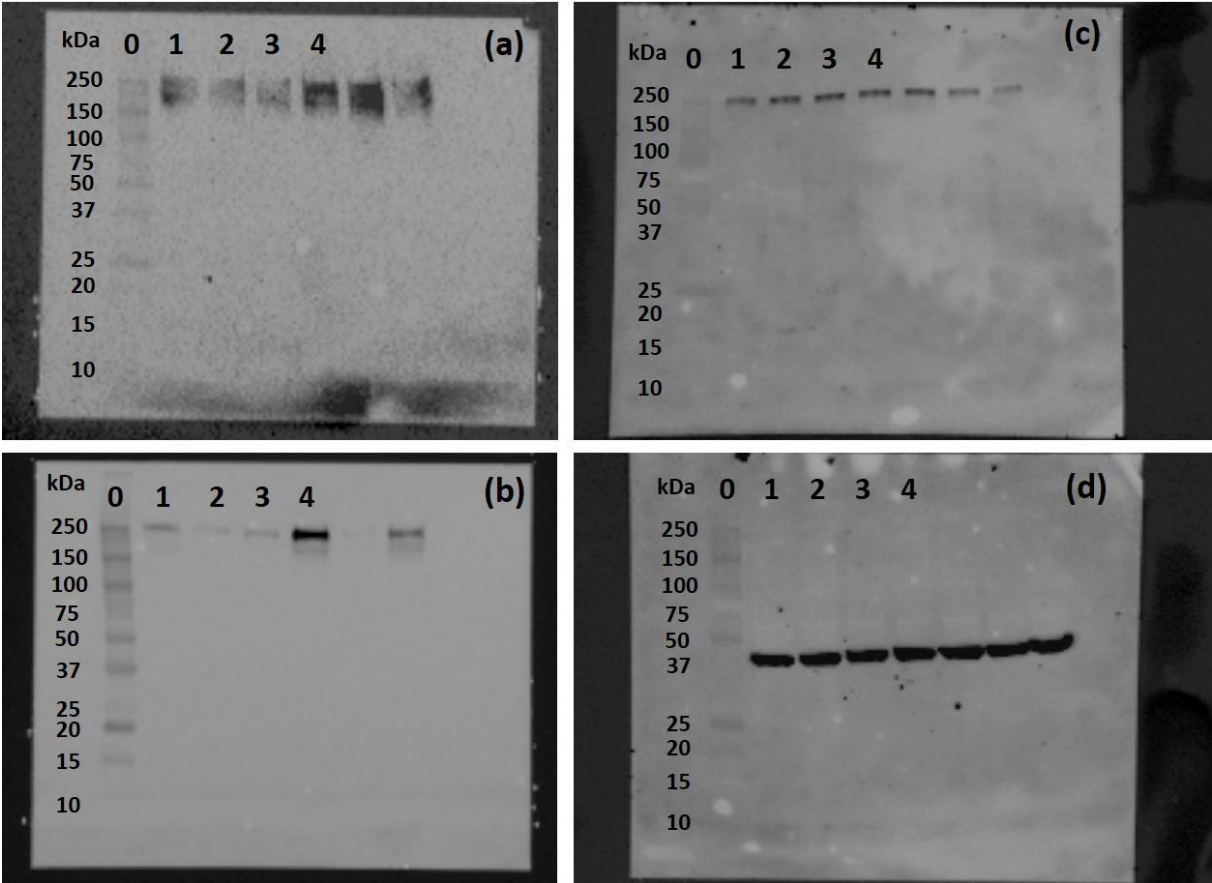

### Supplementary Figure S4

**Figure S4.** ATP- FTIR analysis of PCL-PNIPAAm after 1, 3 and 7 days immersed in culture media at 37 °C. The results showed that the peaks at 1565  $\text{cm}^{-1}$  corresponded to the amide II bond and 1647  $\text{cm}^{-1}$  corresponded to the amide I bond were still present after 7 days, confirming that the conjugation was still stable after one week in culture conditions.

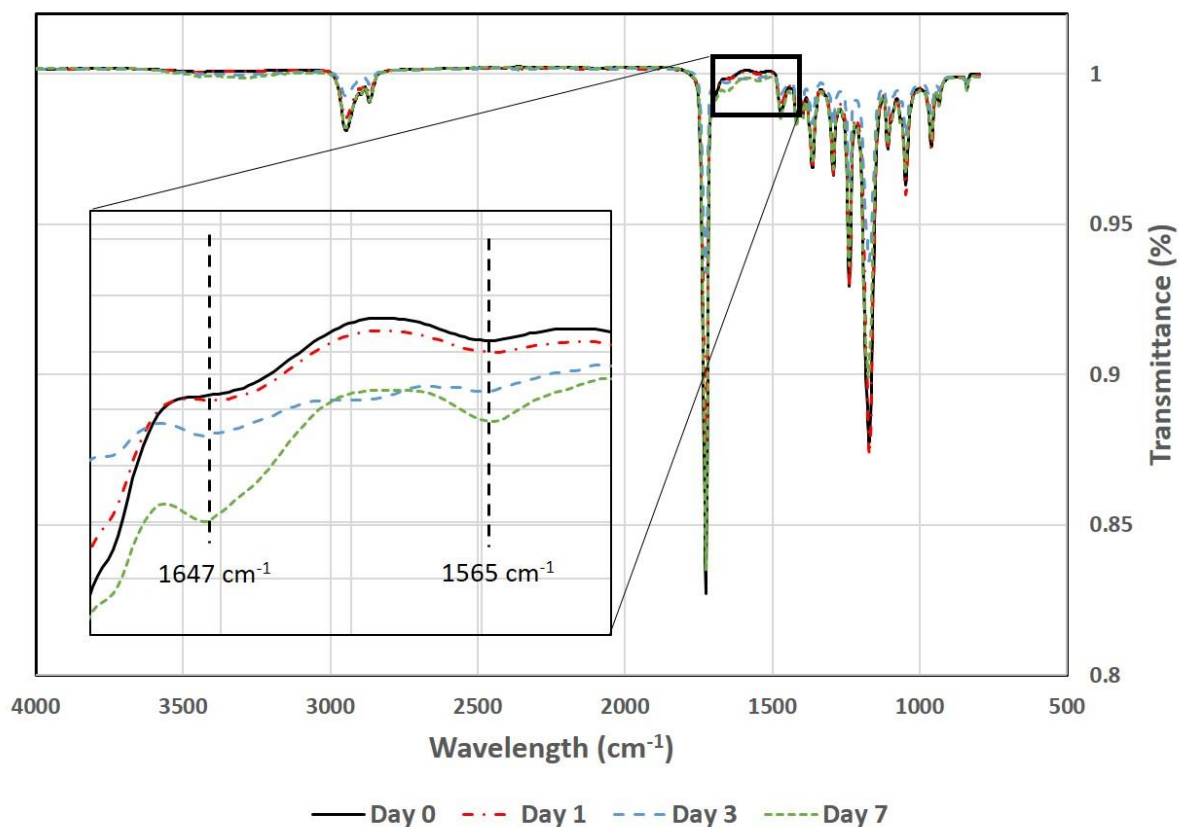

Supplement: 41598_2019_40242_MOESM1_ESM.pdf [file 41598_2019_40242_MOESM1_ESM.pdf]
